# Supplementary material for: In situ anchoring uniform MnO2 nanosheets on three-dimensional macroporous graphene thin-films for supercapacitor electrodes
Source: Royal Society of Chemistry journal article supplement (doi:10.1039/c5ra18691a), 2015-01-01
Supplement: c5ra18691a1.pdf [file c5ra18691a1.pdf]

## Electronic Supplementary Information

### In-situ anchoring uniform MnO<sub>2</sub> nanosheets on three-dimensional macroporous graphene thin-films for supercapacitor electrodes

Yong Zhao <sup>a,b</sup>, Yuena Meng <sup>a</sup>, Haiping Wu <sup>a</sup>, Yue Wang <sup>a</sup>, Zhixiang Wei <sup>a</sup>, Xiaojun Li <sup>a</sup>, Peng Jiang <sup>a,\*</sup>

<sup>a</sup> National Center for Nanoscience and Technology, Beijing 100190, China

<sup>b</sup> ARC Centre of Excellence for Electromaterials Science, Intelligent Polymer Research Institute, AIIIM Facility, Innovation Campus, University of Wollongong, NSW 2522, Australia

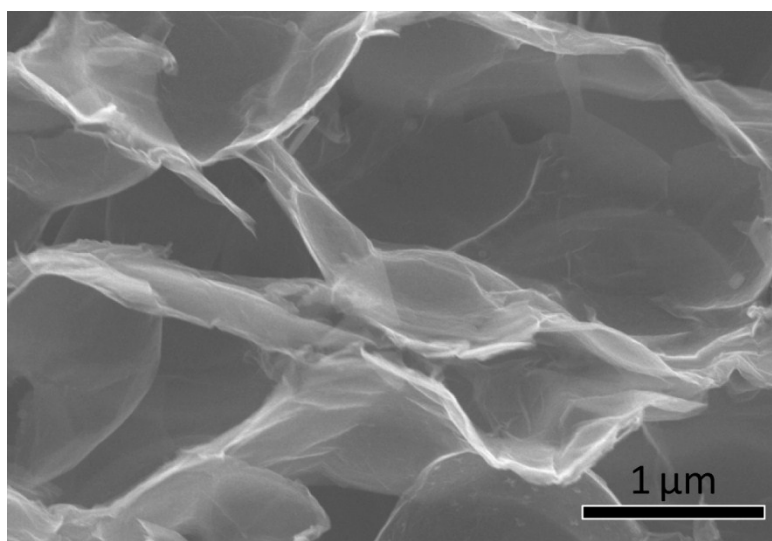

Fig. S1 Typical SEM image of the obtained 3D porous rGO thin-film after 20 minutes of hydrothermal process in 10 mM KMnO<sub>4</sub> solution.

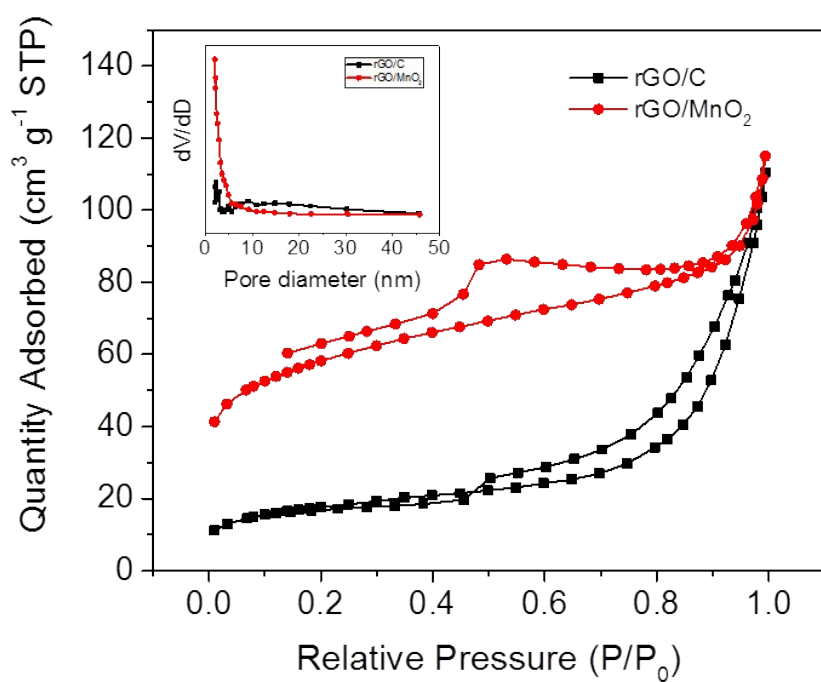

Fig. S2  $N_2$  adsorption/desorption isotherms and the corresponding pore size distribution of rGO/C and rGO/MnO<sub>2</sub> films.

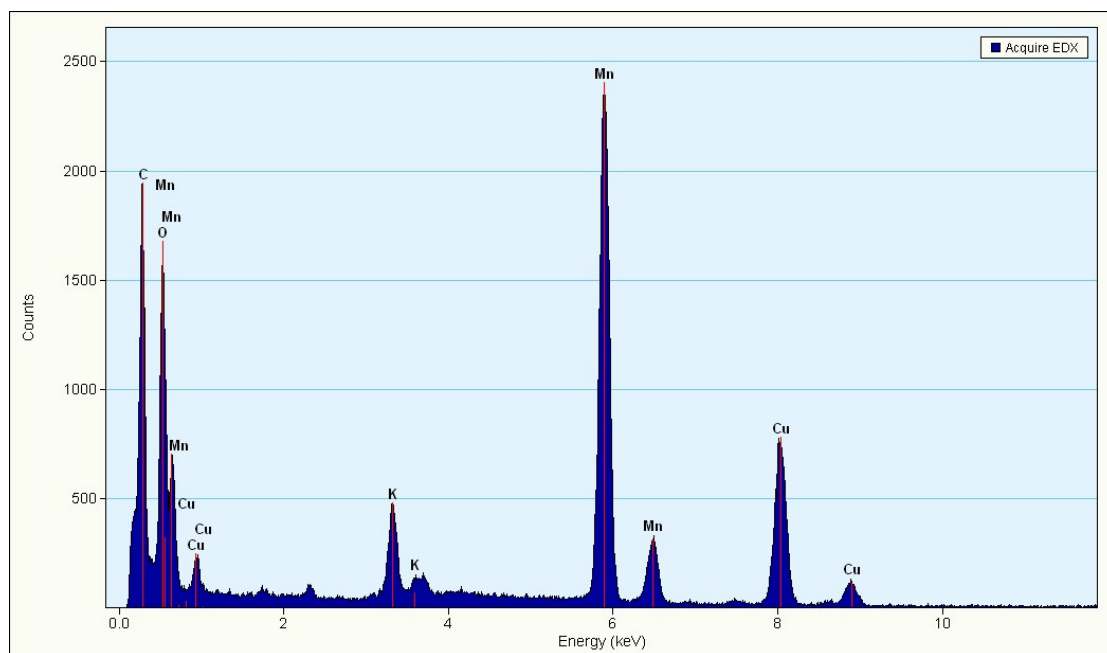

Fig. S3 Energy dispersing X-ray spectrum of the rGO/MnO<sub>2</sub>.

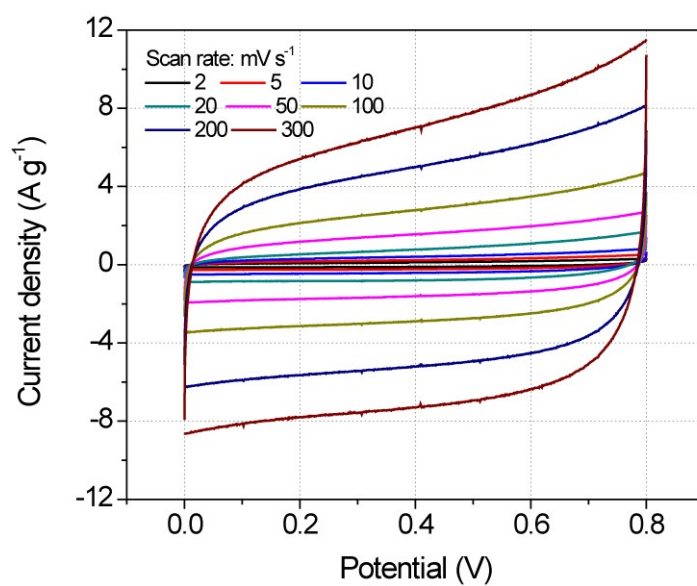

Fig. S4 CV curves of the rGO/C electrodes under different scan rates from  $2 \text{ mV s}^{-1}$  to  $300 \text{ mV s}^{-1}$

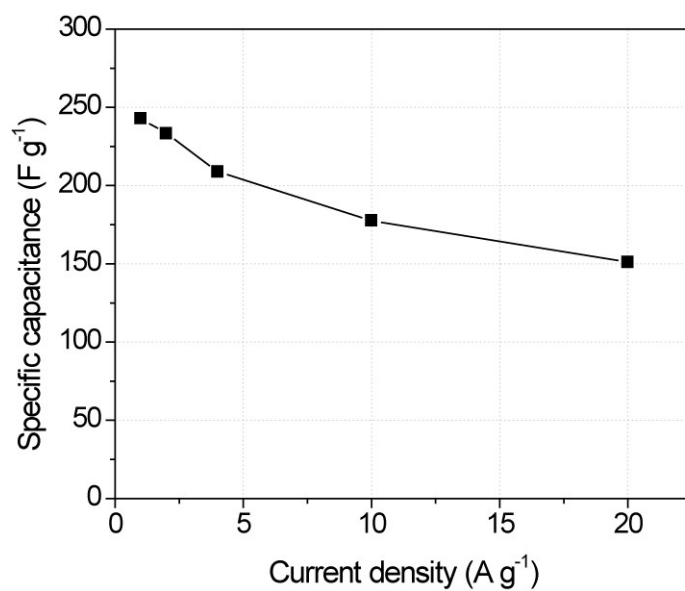

Fig. S5 Specific capacitances calculated from the GCD curves of rGO/MnO<sub>2</sub> films under different charge density from  $1 \text{ A g}^{-1}$  to  $20 \text{ A g}^{-1}$ .
